# Supplementary material
Source: PubMed Central journal article supplement (PMC4161062)
Supplement: Supp_Fig1.pdf [file Supp_Fig1.pdf]

## Supplementary Data

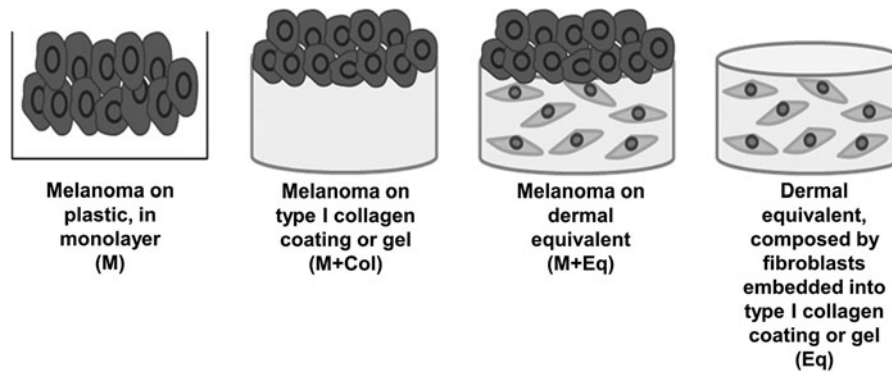

**SUPPLEMENTARY FIG. S1.** Experimental design used to perform the assays described earlier. The conditions used were melanoma grown on plastic in a monolayer (M); on collagen type I (M+Col); on dermal equivalent, consisting of fibroblasts embedded in type I collagen matrix (M+Eq); and dermal equivalent (Eq) with no melanoma cells, utilized as a control.
